# Supplementary material for: Structural Study of N-(1,3-Benzothiazol-2-yl)-4-Halobenzenesulfonylhydrazides: Hirshfeld Surface Analysis and PIXEL Calculations
Source: MDPI journal article supplement (doi:10.3390/cryst14040330), 2024-03-30
Supplement: s1 [file s1]

# Structural study of *N*-(1,3-benzothiazol-2-yl)-4-halobenzenesulfonylhydrazides: Hirshfeld Surface analysis and PIXEL calculations

Ligia R. Gomes <sup>1,2,3,\*</sup>, John N. Low <sup>4</sup>, Alessandra C. Pinheiro <sup>5</sup> and James L. Wardell <sup>4,5,\*</sup>

## Supplementary data

**Table S1.** Crystal data for compounds

|                                    | (1: X = F)                                                                                                | (1: X = Cl)                                                                             | (1: X = Br)                                                                                        |
|------------------------------------|-----------------------------------------------------------------------------------------------------------|-----------------------------------------------------------------------------------------|----------------------------------------------------------------------------------------------------|
| <b>Crystal data</b>                |                                                                                                           |                                                                                         |                                                                                                    |
| Chemical formula                   | C <sub>13</sub> H <sub>10</sub> FN <sub>3</sub> O <sub>2</sub> S <sub>2</sub>                             | C <sub>13</sub> H <sub>10</sub> ClN <sub>3</sub> O <sub>2</sub> S <sub>2</sub>          | C <sub>13</sub> H <sub>10</sub> BrN <sub>3</sub> O <sub>2</sub> S <sub>2</sub>                     |
| <i>M</i> <sub>r</sub>              | 323.36                                                                                                    | 339.81                                                                                  | 384.27                                                                                             |
| Crystal system, space group        | Monoclinic, <i>P</i> 2 <sub>1</sub> / <i>c</i>                                                            | Tetragonal, <i>P</i> <sup>−</sup> 4 <sub>2</sub> 1 <i>c</i>                             | Tetragonal, <i>P</i> <sup>−</sup> 4 <sub>2</sub> 1 <i>c</i>                                        |
| Temperature (K)                    | 100                                                                                                       | 106                                                                                     | 100                                                                                                |
| <i>a</i> , <i>b</i> , <i>c</i> (Å) | 10.8425 (2), 28.6379 (5), 8.8519 (2)                                                                      | 26.2216 (3), 26.2216 (3), 8.9127 (3)                                                    | 26.2525 (4), 26.2525 (4), 9.0132 (4)                                                               |
| α, β, γ (°)                        | 90, 90.906 (2), 90                                                                                        | 90, 90, 90                                                                              | 90, 90, 90                                                                                         |
| <i>V</i> (Å <sup>3</sup> )         | 2748.23 (9)                                                                                               | 6128.1 (2)                                                                              | 6211.8 (3)                                                                                         |
| <i>Z</i>                           | 8                                                                                                         | 16                                                                                      | 16                                                                                                 |
| Radiation type                     | Mo <i>K</i> α                                                                                             | Mo <i>K</i> α                                                                           | Cu <i>K</i> α                                                                                      |
| μ (mm <sup>−1</sup> )              | 0.41                                                                                                      | 0.53                                                                                    | 6.19                                                                                               |
| Crystal size (mm)                  | 0.25 × 0.18 × 0.05                                                                                        | 0.12 × 0.03 × 0.03                                                                      | 0.12 × 0.03 × 0.02                                                                                 |
| <b>Data collection</b>             |                                                                                                           |                                                                                         |                                                                                                    |
| Diffractometer                     | Rigaku FRE+ equipped with HF Varimax confocal mirrors and an AFC10 goniometer and HG Saturn 724+ detector | ROD, Synergy Custom system, HyPix                                                       | ROD, Synergy Custom system, HyPix                                                                  |
| Absorption correction              | Multi-scan <i>CrysAlis PRO</i> 1.171.38.41 (Rigaku Oxford Diffraction, 2015) Empirical absorption         | Multi-scan <i>CrysAlis PRO</i> 1.171.42.51a (Rigaku Oxford Diffraction, 2022) Empirical | Multi-scan <i>CrysAlis PRO</i> 1.171.42.64a (Rigaku Oxford Diffraction, 2022) Empirical absorption |

|                                                                            |                                                                                        |                                                                                                                                    |                                                                                                                                    |
|----------------------------------------------------------------------------|----------------------------------------------------------------------------------------|------------------------------------------------------------------------------------------------------------------------------------|------------------------------------------------------------------------------------------------------------------------------------|
|                                                                            | correction using spherical harmonics, implemented in SCALE3 ABSPACK scaling algorithm. | absorption correction using spherical harmonics, implemented in SCALE3 ABSPACK scaling algorithm.                                  | correction using spherical harmonics, implemented in SCALE3 ABSPACK scaling algorithm.                                             |
| $T_{\min}, T_{\max}$                                                       | 0.641, 1.000                                                                           | 0.877, 1.000                                                                                                                       | 0.469, 1.000                                                                                                                       |
| No. of measured, independent and observed [ $I > 2\sigma(I)$ ] reflections | 17672, 6274, 5678                                                                      | 69206, 7910, 6518                                                                                                                  | 39123, 5760, 4748                                                                                                                  |
| $R_{\text{int}}$                                                           | 0.017                                                                                  | 0.073                                                                                                                              | 0.104                                                                                                                              |
| $(\sin \theta/\lambda)_{\max}$ ( $\text{\AA}^{-1}$ )                       | 0.649                                                                                  | 0.676                                                                                                                              | 0.610                                                                                                                              |
| <b>Refinement</b>                                                          |                                                                                        |                                                                                                                                    |                                                                                                                                    |
| $R[F^2 > 2\sigma(F^2)]$ , $wR(F^2)$ , $S$                                  | 0.043, 0.119, 1.05                                                                     | 0.046, 0.122, 1.06                                                                                                                 | 0.041, 0.102, 1.04                                                                                                                 |
| No. of reflections                                                         | 6274                                                                                   | 7910                                                                                                                               | 5760                                                                                                                               |
| No. of parameters                                                          | 395                                                                                    | 379                                                                                                                                | 379                                                                                                                                |
| H-atom treatment                                                           | H atoms treated by a mixture of independent and constrained refinement                 | H-atom parameters constrained                                                                                                      | H-atom parameters constrained                                                                                                      |
| $\Delta\rho_{\max}, \Delta\rho_{\min}$ ( $\text{e \AA}^{-3}$ )             | 1.30, -0.59                                                                            | 0.53, -0.35                                                                                                                        | 0.55, -0.65                                                                                                                        |
| Absolute structure                                                         | –                                                                                      | Flack x determined using 2495 quotients $[(I^+)-(I^-)]/[(I^+)+(I^-)]$ (Parsons, Flack and Wagner, Acta Cryst. B69 (2013) 249-259). | Flack x determined using 1793 quotients $[(I^+)-(I^-)]/[(I^+)+(I^-)]$ (Parsons, Flack and Wagner, Acta Cryst. B69 (2013) 249-259). |
| Absolute structure parameter                                               | –                                                                                      | 0.00 (2)                                                                                                                           | -0.002 (18)                                                                                                                        |

Computer programs: *CrystalClear-SM Expert 3.1 b27* (Rigaku, 2013), *CrysAlis PRO 1.171.42.51a* (Rigaku OD, 2022), *CrysAlis PRO 1.171.38.41* (Rigaku OD, 2015), *OSCAIL* (McArdle *et al.*, 2004), *SHELXT* (Sheldrick, 2015a), *ShelXle* (Hübschle *et al.*, 2011) *SHELXL2014/7* (Sheldrick, 2015b), *SHELXL2018/1* (Sheldrick, 2018), *Mercury* (Macrae *et al.*, 2006), *SHELXL2014/17* (Sheldrick, 2015b) *PLATON* (Spek, 2009).

**Table S2.** Selected Torsion angles (°)

| Torsion Angle      | (1: X = F) | (1: X = Cl) | (1: X = Br) |
|--------------------|------------|-------------|-------------|
| C12-N121-N122-S22  | 103.89(17) | 107.4(3)    | 106.1(5)    |
| C121-S12-N122-N121 | 58.40(16)  | 55.3(3)     | 56.1(4)     |
| C22-N221-N222-S22  | 106.84(19) | 96.5(4)     | 95.8(5)     |
| C221-S22-N222-N221 | 70.14(17)  | 74.6(4)     | 74.8(4)     |

**Table S3.** Geometric parameters (Å, °) for the  $\pi(I)\cdots\pi(J)$  interactions

|               | Cg(I)⋯Cg(J) | Cg⋯Cg      | $\alpha$  | CgI <sub>perp</sub> | CgJ <sub>perp</sub> | Sym code   | Slippage |
|---------------|-------------|------------|-----------|---------------------|---------------------|------------|----------|
| (1: X = 4-F)  | Cg(2)⋯Cg(7) | 3.9448(15) | 9.35(12)  | 3.4387(10)          | 3.5588(10)          | $x,y,z$    | 1.702    |
| (1: X = 4-F)  | Cg(3)⋯Cg(5) | 3.9711(11) | 7.95(9)   | 3.3440(8)           | 3.5291(8)           | $x,y,z$    | 1.852    |
| (1: X = 4-F)  | Cg(3)⋯Cg(6) | 4.0113(12) | 8.15(10)  | 3.3376(8)           | 3.6097(8)           | $x,y,z$    | 1.749    |
| (1: X = 4-F)  | Cg(5)⋯Cg(3) | 3.9710(11) | 7.95(9)   | 3.5129(8)           | 3.3439(8)           | $x,y,z$    | 2.142    |
| (1: X = 4-F)  | Cg(6)⋯Cg(3) | 4.0112(12) | 8.15(10)  | 3.6097(9)           | 3.3375(8)           | $x,y,z$    | 2.225    |
| (1: X = 4-F)  | Cg(6)⋯Cg(7) | 3.9447(15) | 9.35(12)  | 3.3387(10)          | 3.4387(10)          | $x,y,z$    | 1.933    |
| (1: X = 4-F)  | Cg(5)⋯Cg(7) | 3.6345(12) | 16.76(10) | 3.4741(8)           | 3.5748(9)           | $x,y,1+z$  | 0.656    |
| (1: X = 4-F)  | Cg(7)⋯Cg(5) | 3.6345(12) | 16.76(10) | 3.5748(9)           | 3.4741(8)           | $x,y,-1+z$ | 1.068    |
| (1: X = 4-F)  | Cg(7)⋯Cg(6) | 3.9187(12) | 16.53(11) | 3.5720(9)           | 3.1023(9)           | $x,y,-1+z$ | 2.394    |
| (1: X = 4-Cl) | Cg(2)⋯Cg(7) | 4.202(2)   | 4.2(2)    | 3.2976(14)          | 3.3787(19)          | $x,y,z$    | 2.498    |
| (1: X = 4-Cl) | Cg(7)⋯Cg(1) | 4.202(2)   | 4.2(2)    | 3.3791(19)          | 3.2976(14)          | $x,y,z$    | 2.604    |
| (1: X = 4-Cl) | Cg(2)⋯Cg(7) | 3.818(2)   | 3.0(2)    | 3.4291(16)          | 3.3890(19)          | $x,y,z$    | 1.758    |
| (1: X = 4-Cl) | Cg(7)⋯Cg(2) | 3.818(2)   | 3.0(2)    | 3.3894(19)          | 3.4292(16)          | $x,y,z$    | 1.679    |
| (1: X = 4-Cl) | Cg(3)⋯Cg(5) | 3.900(2)   | 0.3(2)    | 3.4217(17)          | 3.4267(16)          | $x,y,z$    | 1.863    |
| (1: X = 4-Cl) | Cg(5)⋯Cg(3) | 3.901(2)   | 0.3(2)    | 3.4267(16)          | 3.4217(17)          | $x,y,z$    | 1.872    |
| (1: X = 4-Cl) | Cg(3)⋯Cg(6) | 3.893(3)   | 1.5(2)    | 3.4059(17)          | 3.4530(19)          | $x,y,z$    | 1.798    |
| (1: X = 4-Cl) | Cg(6)⋯Cg(3) | 3.893(3)   | 1.5(2)    | 3.4530(19)          | 3.4059(17)          | $x,y,z$    | 1.885    |
| (1: X = 4-Cl) | Cg(5)⋯Cg(7) | 3.831(8)   | 29.3(2)   | 3.4471(16)          | 3.8135(19)          | $x,y,-1+z$ |          |
| (1: X = 4-Cl) | Cg(7)⋯Cg(5) | 3.831(8)   | 29.3(2)   | 3.8132(19)          | 3.4471(16)          | $x,y,1+z$  |          |
| (1: X = 4-Br) | Cg(2)⋯Cg(7) | 3.788(3)   | 2.3(3)    | 3.410(2)            | 3.378(2)            | $x,y,z$    | 1.713    |
| (1: X = 4-Br) | Cg(3)⋯Cg(5) | 3.947(3)   | 1.9(3)    | 3.419(2)            | 3.438(2)            | $x,y,z$    | 1.938    |
| (1: X = 4-Br) | Cg(3)⋯Cg(6) | 3.909(3)   | 3.1(3)    | 3.399(2)            | 3.498(2)            | $x,y,z$    | 1.744    |
| (1: X = 4-Br) | Cg(5)⋯Cg(3) | 3.946(3)   | 1.9(3)    | 3.438(2)            | 3.438(2)            | $x,y,z$    | 1.972    |
| (1: X = 4-Br) | Cg(5)⋯Cg(7) | 3.797(3)   | 28.5(3)   | 3.385(2)            | 3.780(2)            | $x,y,1+z$  |          |
| (1: X = 4-Br) | Cg(6)⋯Cg(2) | 3.909(3)   | 3.1(3)    | 3.498(2)            | 3.399(2)            | $x,y,z$    | 1.931    |
| (1: X = 4-Br) | Cg(7)⋯Cg(2) | 3.788(3)   | 2.3(3)    | 3.378(2)            | 3.410(2)            | $x,y,z$    | 1.649    |
| (1: X = 4-Br) | Cg(7)⋯Cg(5) | 3.797(3)   | 28.5(3)   | 3.780(2)            | 3.385(2)            | $x,y,-1+z$ |          |

Atoms in rings:

Ring (1): S(11) → C(12) → N(13) → C(13A) → C(17A) →

Ring (2): C(13A) --> C(14) --> C(15) --> C(16) --> C(17) --> C(17A) -->  
 Ring (3): C(121) --> C(122) --> C(123) --> C(124) --> C(125) --> C(126) -->  
 Ring (5): S(21) --> C(22) --> N(23) --> C(23A) --> C(27A) -->  
 Ring (6): C(23A) --> C(24) --> C(25) --> C(26) --> C(27) --> C(27A) -->  
 Ring (7): C(221) --> C(222) --> C(223) --> C(224) --> C(225) --> C(226) -->

---

**Table S4.** Assumed molecular pairs formed from intermolecular interactions in compounds (1: X = Cl and Br) on comparisons with confirmed interactions in (1: X = F)

|                                                        |                                                   |                                                                                                                                    | (1: X = Cl)                                                                 | (1: X = Br)                                                                 | Form of molecular pair                              |
|--------------------------------------------------------|---------------------------------------------------|------------------------------------------------------------------------------------------------------------------------------------|-----------------------------------------------------------------------------|-----------------------------------------------------------------------------|-----------------------------------------------------|
| Comparison                                             | Symmetry code of partner to molecule at $x, y, z$ | Interactions (close contacts) in (1: X = Cl or Br)                                                                                 | Distance (Å)<br>angle (°)                                                   | Distance (Å)<br>angle (°)                                                   |                                                     |
| Equivalent to Motif I in (1: X = F)<br>Mol 1...Mol 2   | $x, y, z$                                         | N121 – H121...N23<br>N221 – H221... N13<br>C124- X1--- $\pi$ (6)<br>$\pi$ 2... $\pi$ 7<br>$\pi$ 3... $\pi$ 5<br>$\pi$ 3... $\pi$ 6 | 2.00 ; 166<br>2.07; 149<br>3.718(2);131<br>3.818(2)<br>3.900(2)<br>3.893(3) | 2.00; 166<br>2.10; 145<br>3.824(3); 131<br>3.788(3)<br>3.497(3)<br>3.909(3) | Unsymmetric<br>R <sup>2</sup> <sub>2</sub> (8)dimer |
| Equivalent to Motif III in (1: X = F)<br>Mol 1...Mol 1 | $1.5-y, 1.5-x, 0.5+z$                             | N122 – H122 ... O122<br>C17-H17--- $\pi$ (1)                                                                                       | 2.11 <sup>f</sup> ; 147 <sup>g</sup><br>2.83 <sup>h</sup> ;131 <sup>i</sup> | 2.37; 127<br>2.83; 131                                                      | Unsymmetric<br>cyclic dimer                         |
| Equivalent to Motifs IVa /IVb<br>Mol 2...Mol 2         | $x, y, 1+z$<br>$x, y, -1+z$                       | $\pi$ 5... $\pi$ 7<br>$\pi$ 7... $\pi$ 5                                                                                           | 3.4471(16)<br>3.8135(19)                                                    | 3.385(2)/<br>3.780(2)                                                       | Unsymmetric<br>linear dimer                         |
| Not in (1: X = F)                                      | $0.5+y, -0.5+y, 0.5+z$                            | C26-H26---X1                                                                                                                       | 2.81; 148                                                                   | 2.92; 148                                                                   | Unsymmetric<br>acyclic dimer                        |
